# Supplementary material for: snoDB 2.0: an enhanced interactive database, specializing in human snoRNAs
Source: PubMed Central journal article supplement — Nucleic Acids Res. 2022 Sep 27;51(D1):D291–6. doi: 10.1093/nar/gkac835 (PMC9825428; doi:10.1093/nar/gkac835), 2022-09-27
Supplement: gkac835_supplemental_file.pdf [file gkac835_supplemental_file.pdf]

| <b>rRNA</b> | <b>Version/ID</b>                                                             | <b>Articles using this version</b>                                                                                                                                                                       |
|-------------|-------------------------------------------------------------------------------|----------------------------------------------------------------------------------------------------------------------------------------------------------------------------------------------------------|
| 5.8S        | <a href="#">U13369.1:6623-6779</a> ,<br><a href="#">NR_046235.3:6601-6757</a> | <a href="#">snoRNABase</a> , <a href="#">snoRNA Atlas</a> , <a href="#">snOPY</a> , <a href="#">Gumienny et al. (2017)</a> , <a href="#">Incarnato et al. (2017)</a> , <a href="#">Zhu et al. (2017)</a> |
| 18S         | <a href="#">X03205.1</a>                                                      | <a href="#">snoRNABase</a> , <a href="#">snoRNA Atlas</a>                                                                                                                                                |
| 18S         | <a href="#">NR_003286</a>                                                     | <a href="#">snOPY</a> , <a href="#">Gumienny et al. (2017)</a>                                                                                                                                           |
| 18S         | <a href="#">NR_145820.1</a>                                                   | <a href="#">Incarnato et al. (2017)</a> , <a href="#">Zhu et al. (2017)</a>                                                                                                                              |
| 28S         | <a href="#">U13369.1:7935-12969</a>                                           | <a href="#">snoRNABase</a> , <a href="#">snoRNA Atlas</a> , <a href="#">snOPY</a> , <a href="#">Gumienny et al. (2017)</a>                                                                               |
| 28S         | <a href="#">NR_003287.4</a>                                                   | <a href="#">Incarnato et al. (2017)</a> , <a href="#">Zhu et al. (2017)</a>                                                                                                                              |

Table S1. Most widely used rRNA versions in the literature.

|                                                                                   |             |                 |           |            |         |
|-----------------------------------------------------------------------------------|-------------|-----------------|-----------|------------|---------|
| 136,726,104                                                                       | 136,726,239 | Ensembl ID      | RefSeq ID | HGNC ID    | Rfam ID |
|  |             | ENSG00000280496 | -         | -          | RF00416 |
| 136,726,105                                                                       | 136,726,234 | Ensembl ID      | RefSeq ID | HGNC ID    | Rfam ID |
|  |             | ENSG00000276161 | -         | HGNC:32636 | RF00416 |
| 136,726,104                                                                       | 136,726,237 | Ensembl ID      | RefSeq ID | HGNC ID    | Rfam ID |
|  |             | -               | NR_002975 | HGNC:32636 | -       |

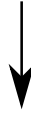

### snoDB0971

|                                                                                   |             |                                 |           |            |         |
|-----------------------------------------------------------------------------------|-------------|---------------------------------|-----------|------------|---------|
| 136,726,104                                                                       | 136,726,239 | Ensembl ID                      | RefSeq ID | HGNC ID    | Rfam ID |
|  |             | ENSG00000280496;ENSG00000276161 | NR_002975 | HGNC:32636 | RF00416 |

Figure S1. SnoRNAs from different sources are merged to give at most one entry per chromosomal position in snoDB 2.0. Example of three independent overlapping entries from Ensembl (first two) and one from RefSeq (last one) for the snoRNA SNORA17B. The merged entry groups together all useful ids and information.

### Compilation of 2'-O-methylation levels for the 18S rRNA in all studies for position Cm174

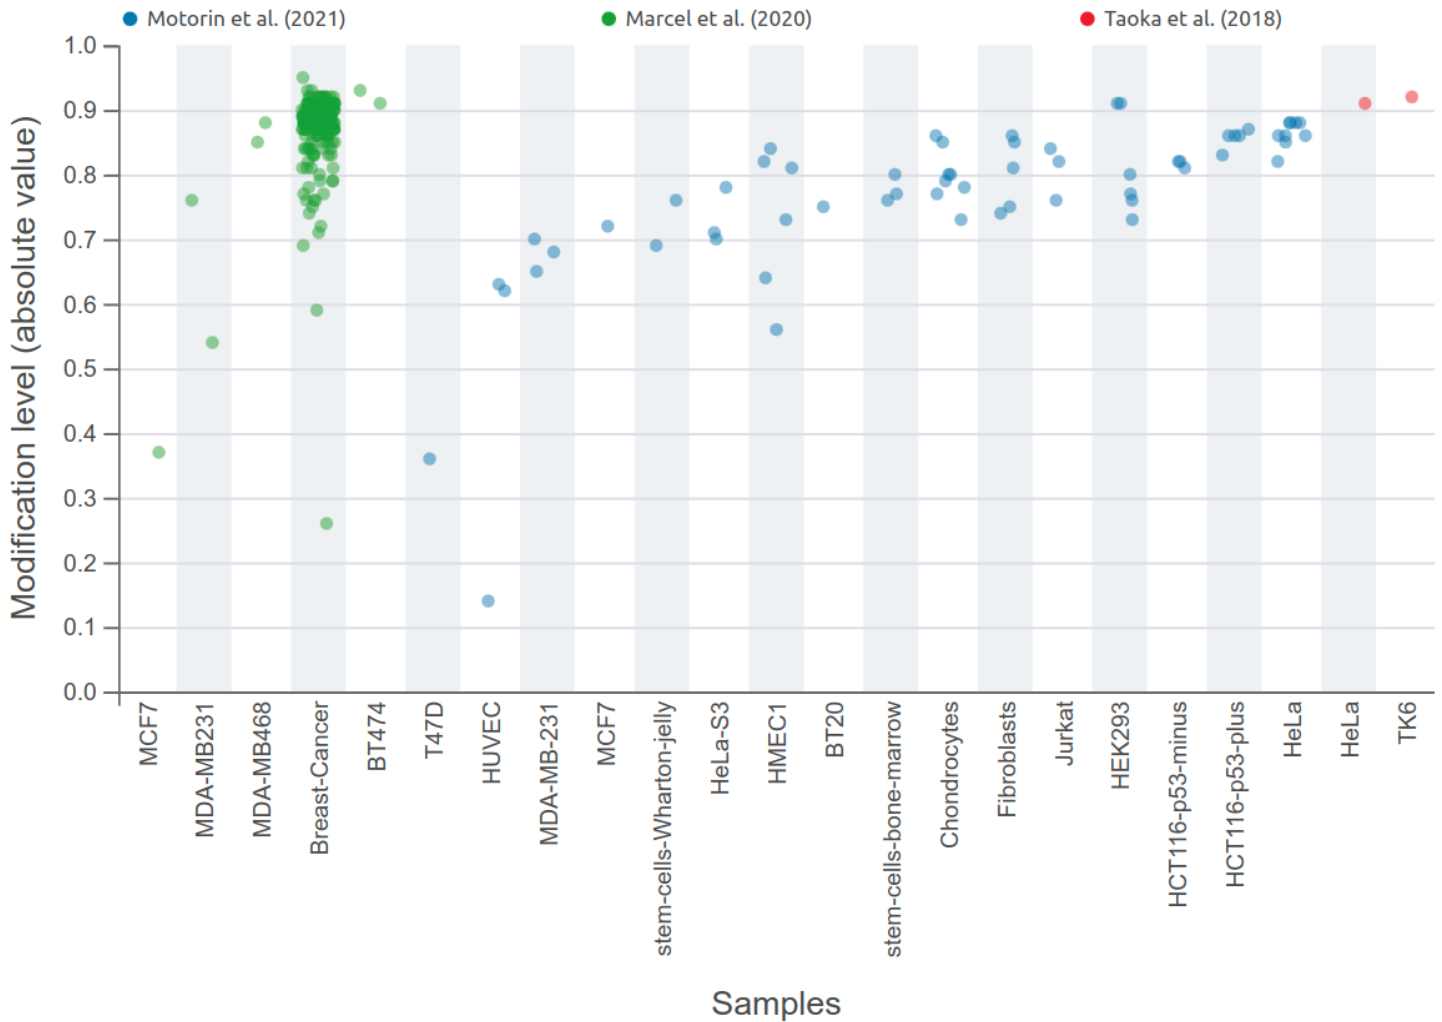

Figure S2. Screenshot of the detailed dot plot for a specific position in the "modification levels" subsection. Each value (modification level ranging from 0 to 1) from a sample is represented as a dot, and grouped by cell type. Colors represent different studies. The dot plot can also be reordered according to the mean value, tissue - cell lines, alphabetical order of the samples or by the studies (default).
